# Supplementary material for: Electrodeposited Superhydrophilic‐Superhydrophobic Composites for Untethered Multi‐Stimuli‐Responsive Soft Millirobots
Source: PubMed Central journal article supplement (PMC10427389; doi:10.1002/advs.202302409), 2023-06-08
Supplement: ADVS-10-2302409-s005.pdf [file ADVS-10-2302409-s005.pdf]

## Supporting Information

for *Adv. Sci.*, DOI 10.1002/adv.202302409

Electrodeposited Superhydrophilic-Superhydrophobic Composites for Untethered Multi-Stimuli-Responsive Soft Millirobots

*Zhiqiang Zheng, Jie Han, Sinan Ozgun Demir, Huaping Wang, Weitao Jiang, Hongzhong Liu and Metin Sitti\**

## Supporting Information

**Electrodeposited superhydrophilic-superhydrophobic composites for untethered multi-stimuli-responsive soft millirobots**

Zhiqiang Zheng, Jie Han, Sinan Ozgun Demir, Huaping Wang, Weitao Jiang, Hongzhong Liu, Metin Sitti

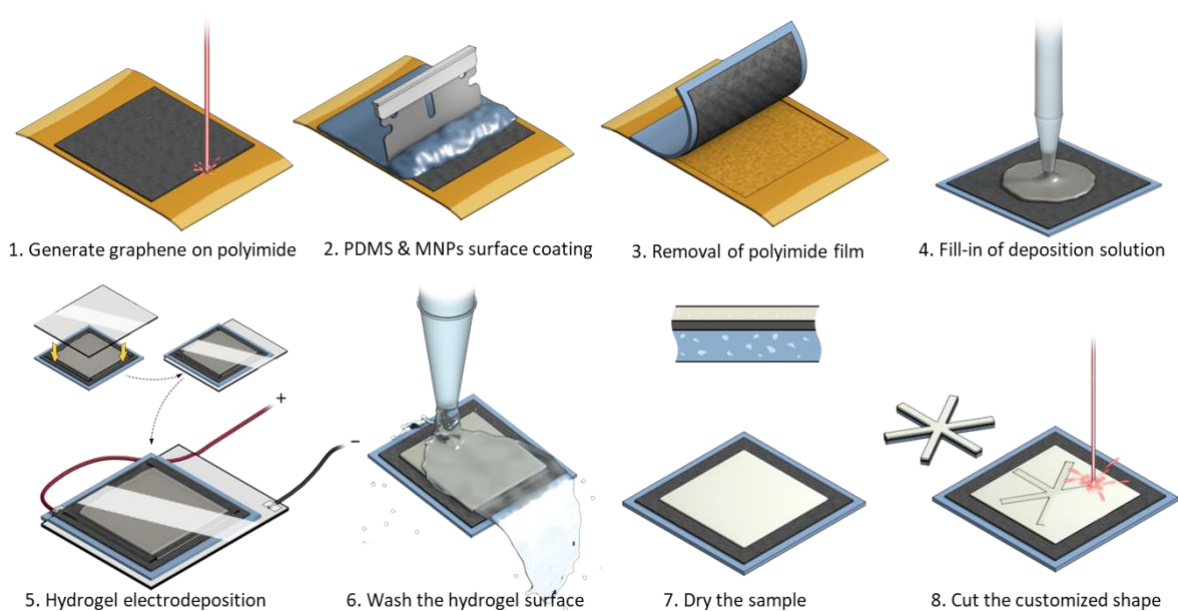

**Figure S1.** Schematics of the MSR fabrication process.

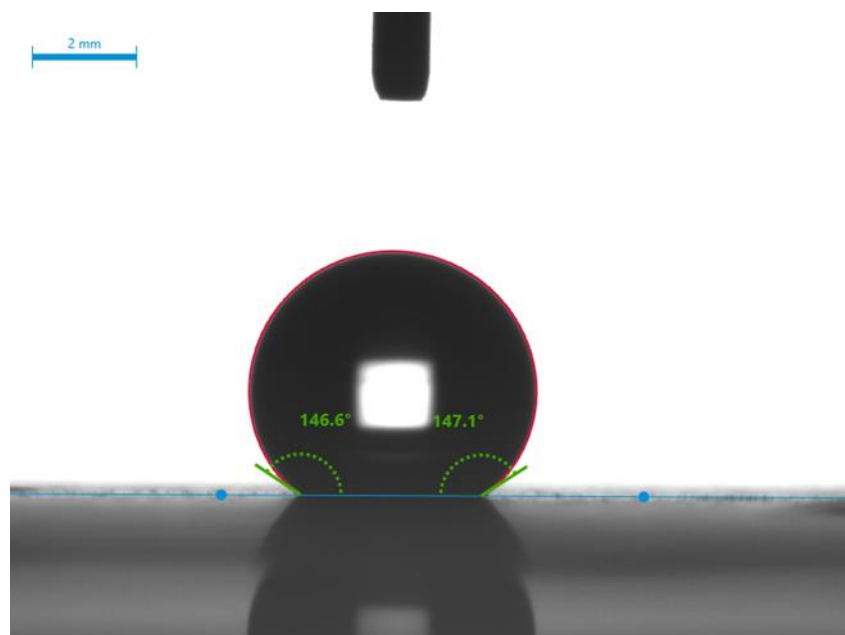

**Figure S2.** Water contact angle of the LIG-coated PDMS. 4  $\mu\text{L}$  water droplet was used to test the contact angle of the surface.

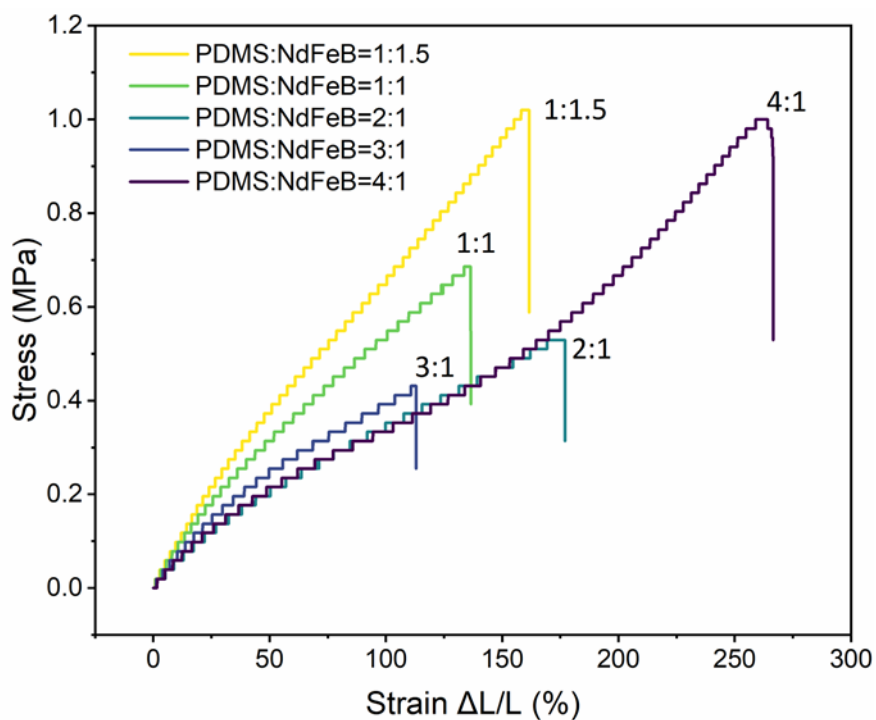

**Figure S3.** Tensile test of the composite stripe structures with PDMS and NdFeB microparticle ratio of 1:1.5, 1:1, 2:1, 3:1 and 4:1.

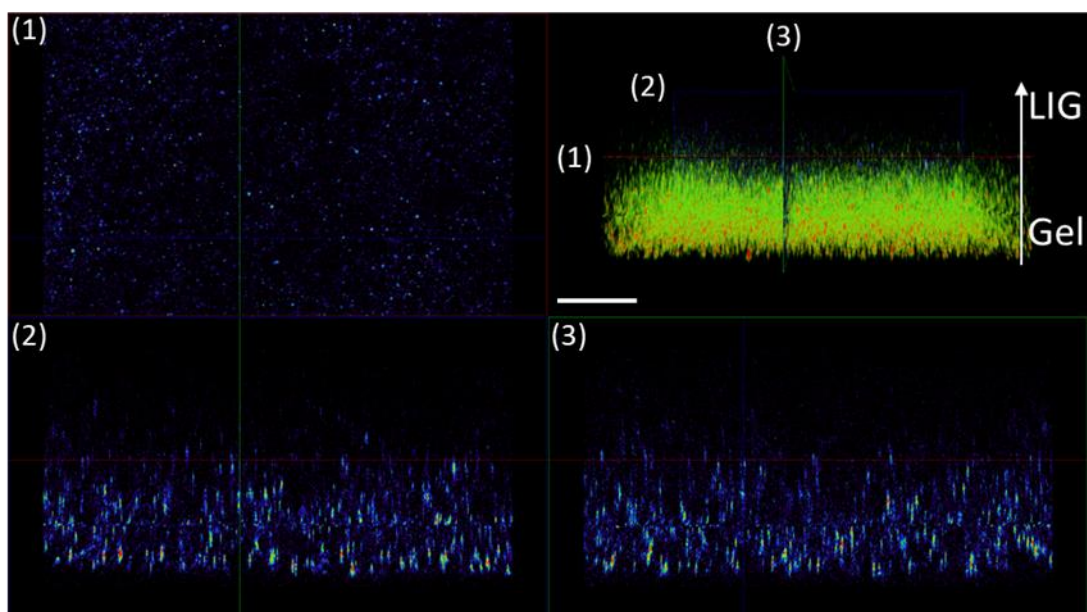

**Figure S4.** The three section views fluorescent images of hydrogel interface. This image is scanned along the surface of hydrogel to the LIG. Scale bar: 100  $\mu\text{m}$ .

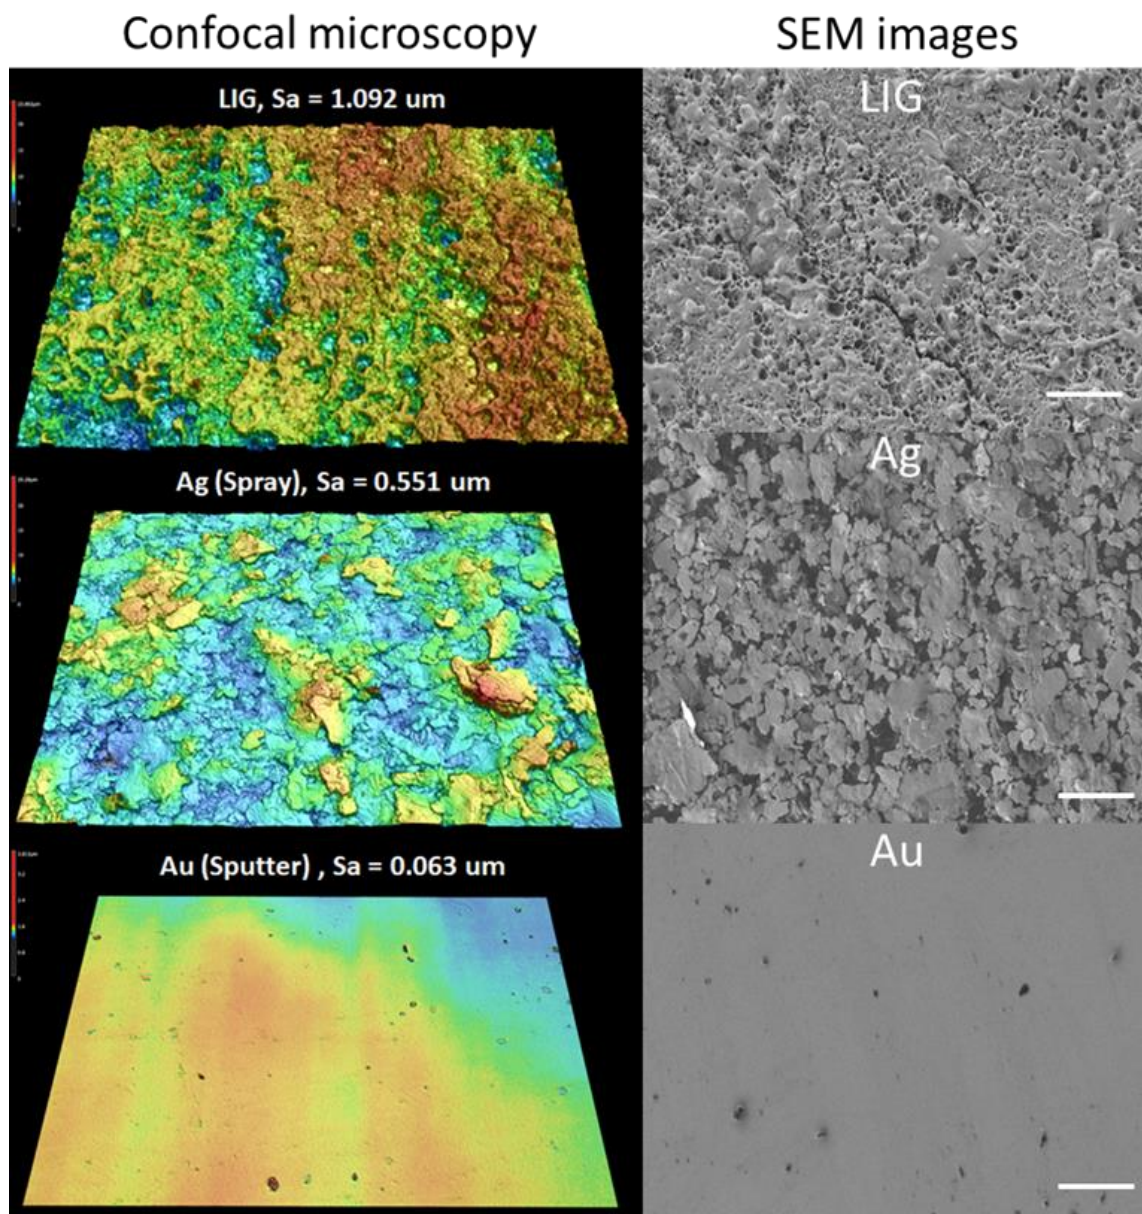

**Figure S5.** The confocal and SEM images of LIG, sprayed silver (Ag), and sputtered gold (Au) surface.  $S_a$  represents the arithmetical mean height of the surface. Scale bar: 20  $\mu\text{m}$ .

Calcium ion solution infiltration

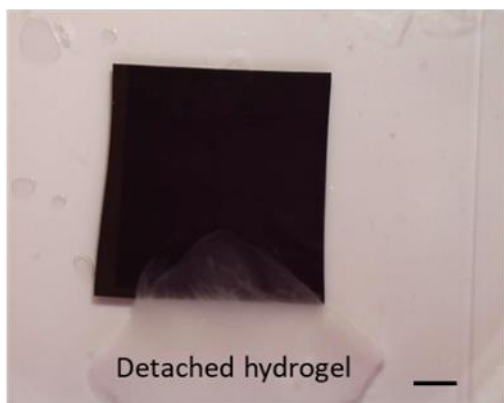

Electrodeposition

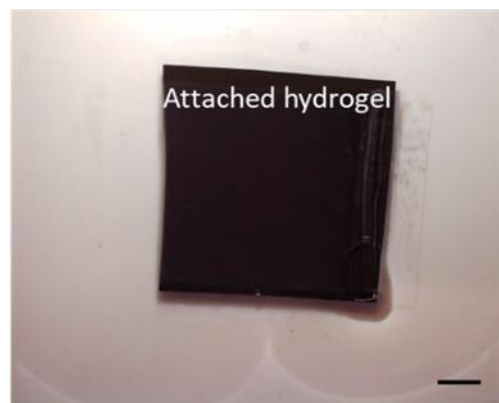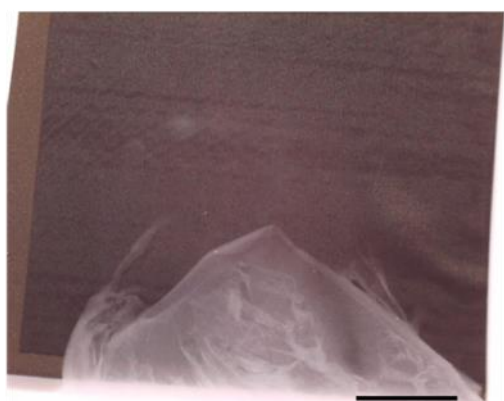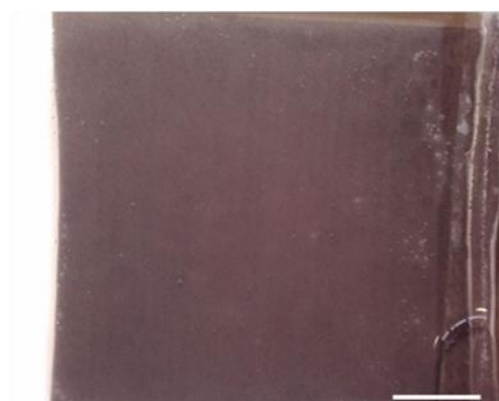

**Figure S6.** Calcium ion solution and electrodeposition gelation result after 1-min washing process. Scale bar: 1 cm.

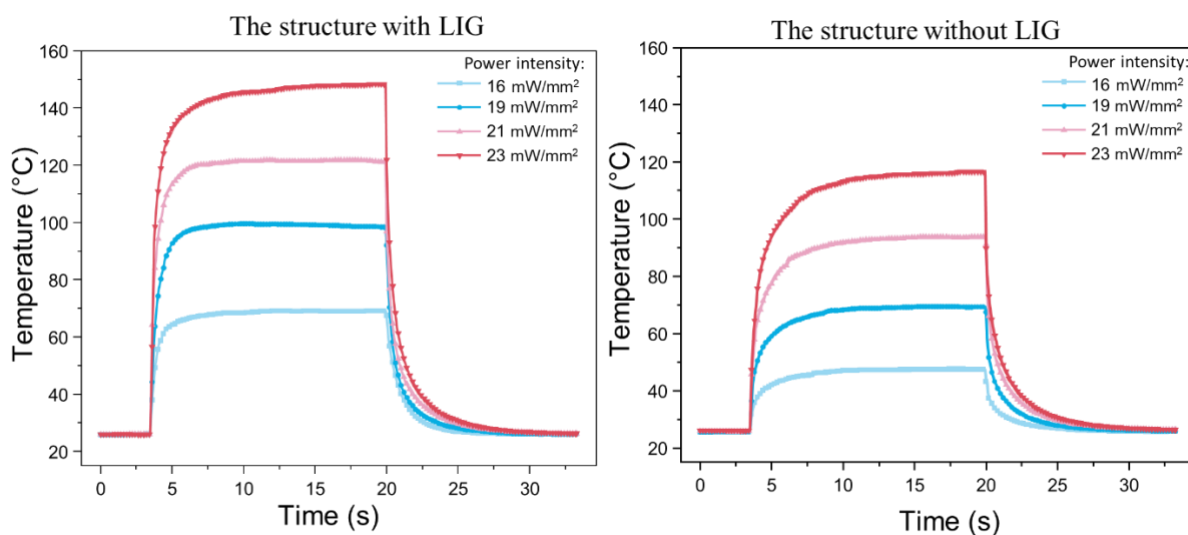

**Figure S7.** Time-dependent temperature as function of the power intensity. Power intensity produced by laser varying from 23 mW/mm<sup>2</sup> to 16 mW/mm<sup>2</sup> on PDMS film with and without LIG.



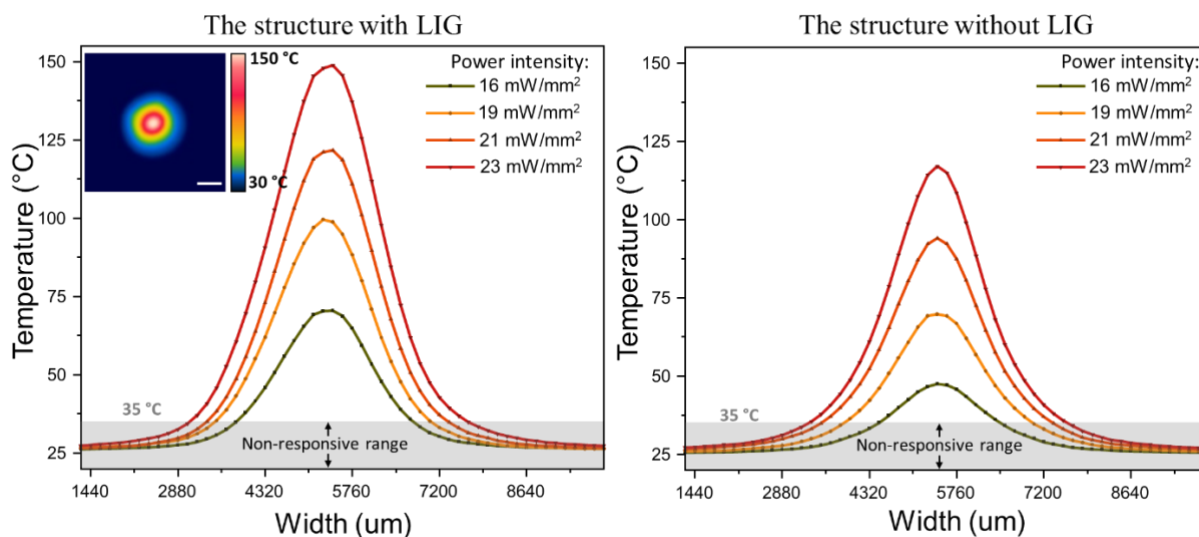

**Figure S8.** Width-dependent temperature as a function of the power intensity. Power intensity produced by laser varying from 23 mW/mm<sup>2</sup> to 16 mW/mm<sup>2</sup> on PDMS film with and without laser induced graphene.

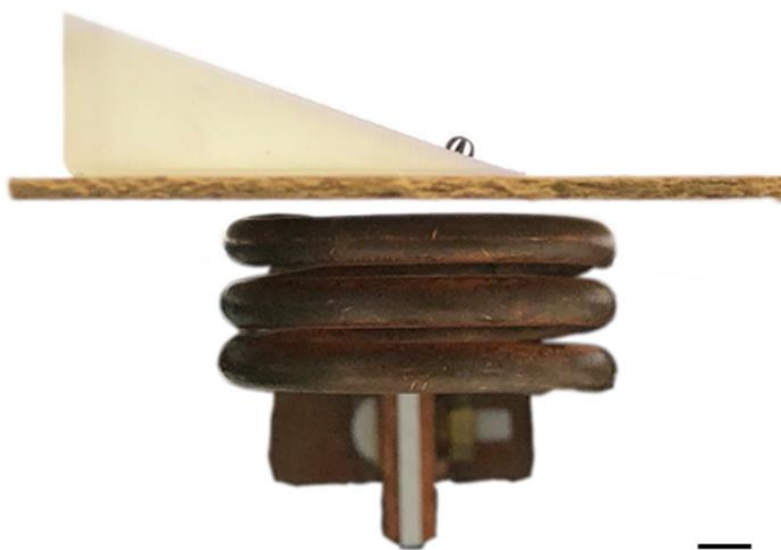

**Figure S9.** Photo of the radio frequency (RF) magnetic field heating setup. Scale bar: 2 mm. The stage is around 1 mm above the electromagnetic coil.

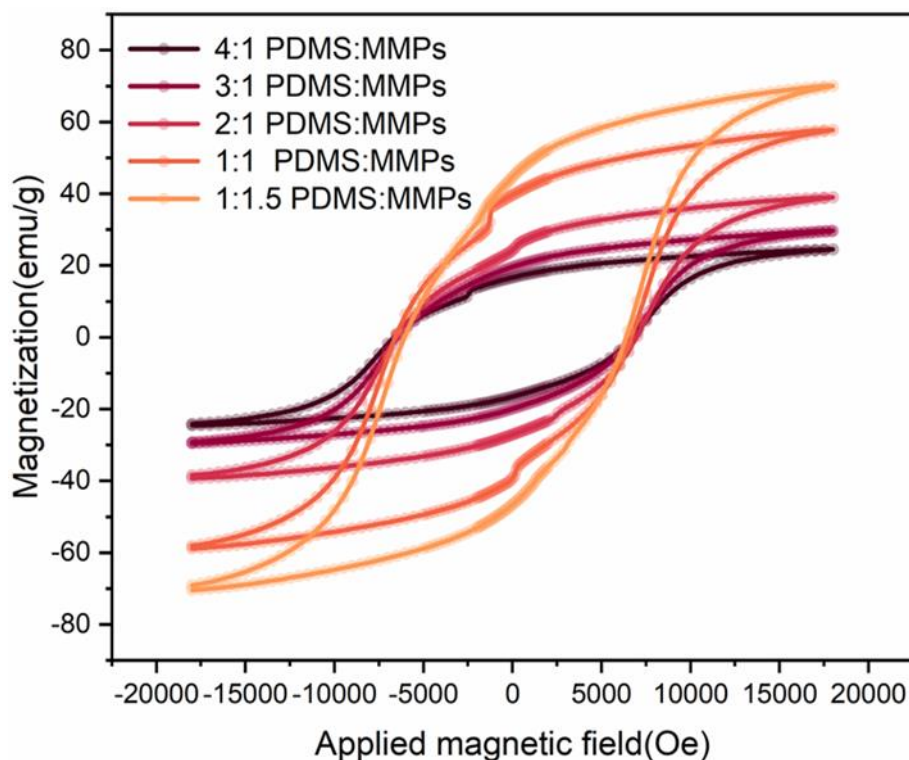

**Figure S10.** Measured magnetic hysteresis curves (four-quadrant BH curves) of the composite materials. The ratios are 4:1, 3:1, 2:1, 1:1, 1:1.5 of PDMS: magnetic microparticles (MMPs) mass ratio.

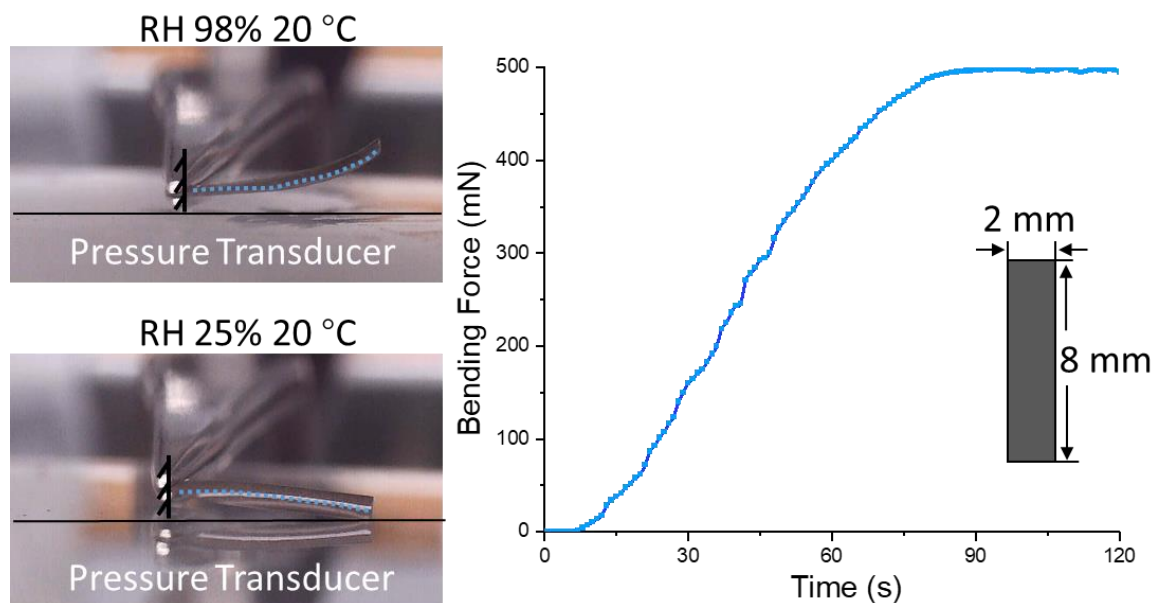

**Figure S11.** Bending force test of the MSR from 98% RH to 25% RH in the room temperature. The size of tested beam structure is 2-mm width and 8-mm length. The maximum bending force is around 500 mN.



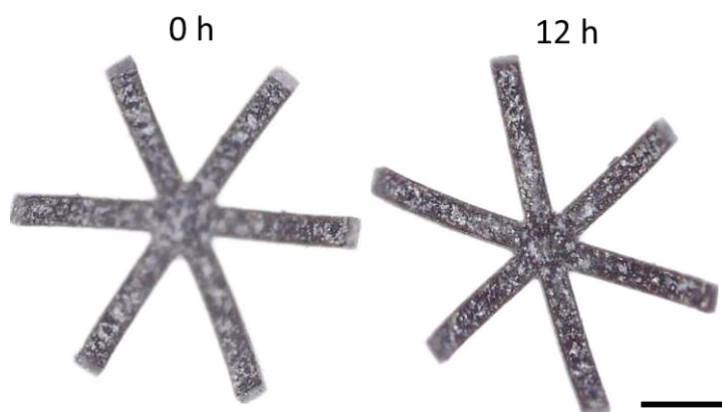

**Figure S12.** Stability test of the MSR in 95% RH for 12 hours. Scale bar: 1 mm.

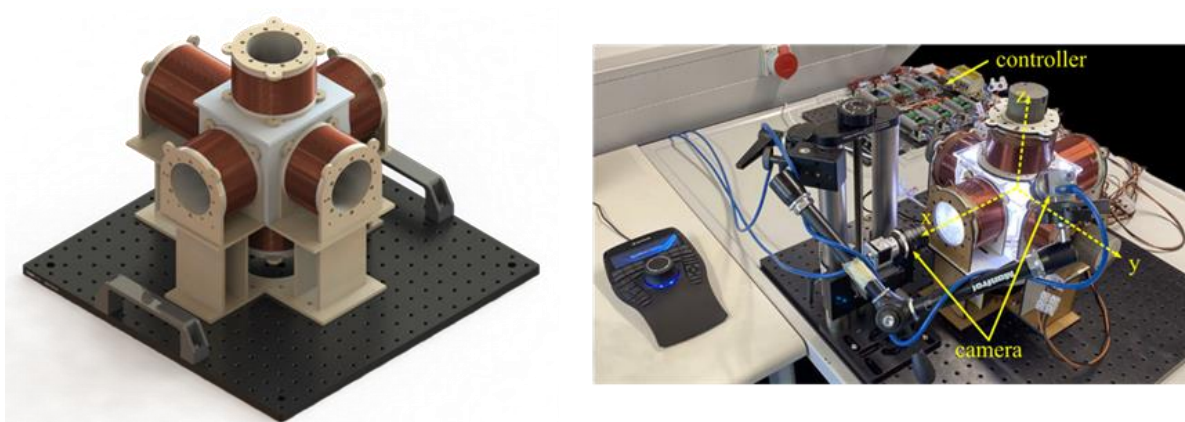

**Figure S13.** The schematic and image of the magnetic coil setup, which is used to apply 3D magnetic fields on the MSRs in the workspace.

**Supplementary Videos**

**Video S1.** Confocal microscopic 3D image of fluorescent nano particle loaded hydrogel interface.

**Video S2.** Bending of stripe structure in response to humidity change.

**Video S3.** Shape-morphing and simulation of the stripe structure.

**Video S4.** Hand humidity reaction of the cross structure.

**Video S5.** Shape-morphing of the flower, vine, mimosa and flytrap shaped structure

**Video S6.** Self-propulsion of asymmetric petal-shaped structures.

**Video S7.** MSRs conducting local transformation in response to the laser heating.

**Video S8.** MSRs conducting uniform shape morphing in response to the radio frequency heating.

**Video S9.** MSRs climbing the slope with choppy surface.

**Video S10.** Multimodal motion of snowflake shaped MSR in response to the environmental changes.

**Video S11.** Multimodal motion of stripe shaped MSR in response to the environmental changes.

**Video S12.** Multimodal motion of cross shaped MSR in response to the environmental changes.

**Video S13.** Movement adaptability of MSR in air and liquid.

**Video S14.** Multi-tasking of MSR in response to the environmental changes.
